1 **Extremely rare variants reveal patterns of germline mutation rate**  
2 **heterogeneity in humans**

3

4 Jedidiah Carlson<sup>1</sup>, Laura J Scott<sup>2</sup>, Adam E Locke<sup>3</sup>, Matthew Flickinger<sup>2</sup>, Shawn Levy<sup>4</sup>, The BRIDGES  
5 Consortium<sup>†</sup>, Richard M Myers<sup>4</sup>, Michael Boehnke<sup>2</sup>, Hyun Min Kang<sup>2</sup>, Jun Z Li<sup>1,5\*</sup>, Sebastian Zöllner<sup>2,6\*</sup>

6

7 <sup>1</sup>Department of Computational Medicine & Bioinformatics, University of Michigan, Ann Arbor, MI, USA

8 <sup>2</sup>Department of Biostatistics, University of Michigan, Ann Arbor, MI, USA

9 <sup>3</sup>McDonnell Genome Institute & Department of Medicine, Washington University, St. Louis, MO, USA

10 <sup>4</sup>HudsonAlpha Institute for Biotechnology, Huntsville, AL, USA

11 <sup>5</sup>Department of Human Genetics, University of Michigan, Ann Arbor, MI, USA

12 <sup>6</sup>Department of Psychiatry, University of Michigan, Ann Arbor, MI, USA

13 <sup>†</sup>*a full list of BRIDGES collaborators is provided in the supplementary material*

14 *\*both authors contributed equally*

## 15 **Abstract**

16 Precise estimates of the single-nucleotide mutation rate and its variability are essential to the study of  
17 human genome evolution and genetic diseases. Here we use ~36 million singleton variants observed in  
18 3,716 whole-genome sequences to characterize the heterogeneity of germline mutation rates across  
19 the genome. Adjacent-nucleotide context is the strongest predictor of mutability, with mutation rates  
20 varying by >650-fold depending on the identity of three bases upstream or downstream of the mutated  
21 site. Histone modifications, replication timing, recombination rate, and other local genomic features  
22 further modify mutability; magnitude and direction of this modification varies with the sequence context.  
23 Compared to estimates based on common variants used in previous approaches, singleton-based  
24 estimates provide a more accurate prediction of the mutation patterns seen in an independent dataset  
25 of ~46,000 *de novo* mutations; and incorporating the effects of genomic features further improves the  
26 prediction. The effects of sequence contexts, genomic features, and their interactions reported here  
27 capture the most refined portrait to date of the germline mutation patterns in humans.

## 28 Introduction

29 Germline mutagenesis is a fundamental biological process, and underlies all heritable genetic variation  
30 (see Segurel et al.<sup>1</sup> for a review). Mutation rate models are widely used in genomics research to  
31 calibrate variant calling algorithms<sup>2</sup>, infer demographic history<sup>3</sup>, identify recent patterns of genome  
32 evolution<sup>4</sup>, and interpret clinical sequencing data to prioritize likely pathogenic mutations<sup>5</sup>. While  
33 mutation is an inherently stochastic process, the distribution of mutations in the human genome is not  
34 uniform and is correlated with genomic and epigenomic features including local sequence context<sup>6,7</sup>,  
35 recombination rate<sup>8</sup>, and replication timing<sup>9</sup>. Hence, there is considerable interest in studying the  
36 regional variation and context dependency of mutation rates to understand the basic biology of  
37 mutational processes and to accurately model this variability.

38 The gold standard for studying the germline mutation rate in humans is direct observation of *de*  
39 *novo* mutations from family-based whole-genome sequencing data<sup>9-12</sup>. These studies have produced  
40 accurate estimates of the genome-wide average mutation rate ( $\sim 1 - 1.5 \times 10^{-8}$  mutations per site per  
41 generation), and uncovered associations between mutation rates and certain features of the genomic  
42 landscape. However, given the inherently low germline mutation rate, family-based whole-genome  
43 sequencing studies have detected relatively few *de novo* mutations (<60,000 in  $\sim 1,000$  trios reported so  
44 far, or 1-2 per 100,000 bases), making it difficult to precisely estimate mutation rates at a fine scale and  
45 identify factors that explain how the mutation rate varies across the genome.

46 Other studies have used between-species substitutions or within-species polymorphisms to  
47 study mutation patterns<sup>7,8,13-16</sup>. Because these variants arose hundreds or thousands of generations  
48 ago, they have been subject to evolutionary forces (such as natural selection) that nonrandomly alter  
49 the frequencies of variants in the population. To avoid the confounding effects of selection, these  
50 studies focus on substitutions/polymorphisms that occur in intergenic (non-coding) regions of the  
51 genome, which are less often the target of selective pressure. Nevertheless, even putatively neutral loci  
52 may be under some degree of selection<sup>17-19</sup>, and are susceptible to GC-biased gene conversion  
53 (gBGC), in which recombination-induced mismatches are preferentially repaired to G/C base pairs,

54 resulting in a greater number of A/T-to-G/C polymorphisms than expected under neutral evolution<sup>11,20,21</sup>.  
55 Consequently, these processes bias the resulting distribution of variation, making it difficult to  
56 determine which patterns of variation are attributable to the initial mutation processes, and which are  
57 due to subsequent selection or gBGC.

58 We introduce an approach that leverages a new data source to characterize the regional  
59 variability of germline mutations at high resolution, and to quantify the influence of genomic context  
60 while minimizing the confounding effects of selection and gBGC. Our approach exploits a collection of  
61 >36 million extremely rare variants (ERVs), at a sample minor allele frequency (MAF) of  
62  $1/7432=0.00013$  (i.e., singleton variants in our dataset). Compared to between-species substitutions or  
63 common variants in humans, these ERVs are extremely young on the evolutionary timescale, making  
64 them much less likely to be affected by evolutionary processes other than drift<sup>1,11,20,22</sup>. ERVs thus  
65 represent a relatively unbiased sample of recent mutations, and are far more numerous than *de novo*  
66 mutations collected in family-based studies.

67 Our results show that mutation rate heterogeneity is primarily dependent on sequence context  
68 of adjacent bases, and this sequence-specific mutability varies with respect to genomic features in  
69 wider surrounding regions, including replication timing, recombination rate, and histone modifications.  
70 Importantly, the impact of genomic features often depends on the actual sequence context at adjacent  
71 bases, demonstrating the importance of jointly analyzing sequence context and genomic features. Our  
72 sample of ~36M ERVs allows systematic estimates of these quantitative and often non-additive effects,  
73 providing a refined resource for modeling human germline mutations. We evaluate parameters  
74 estimated from ERVs in an independent dataset of *de novo* mutations and show that models that  
75 combine sequence context and genomic features substantially improve predictions of *de novo*  
76 mutations. Moreover, ERV-based predictions are less biased than predictions using parameters  
77 estimated from ancestrally older variants.

## 78 Results

### 79 ERV data source: variant calling and quality control

80 In the Bipolar Research in Deep Genome and Epigenome Sequencing (BRIDGES) study, we  
81 sequenced the genomes of 3,716 unrelated individuals of European ancestry to an average diploid-  
82 genome coverage of 9.6X; after variant calling and filtering, we identified 63,566,013 autosomal single-  
83 nucleotide variants in the mappable genome, 36,087,319 (57%) of which were singletons (ERVs),  
84 present in only a single individual from the BRIDGES sample (**Materials and Methods**). According to a  
85 simple demographic model with a growth rate of 4% per generation and effective *recent* population size  
86 of 500,000, we estimate that the average age of an ERV in this sample is approximately 46  
87 generations<sup>23</sup>. We estimate fewer than 2.6% of these ERVs are false positives, which is similar to the  
88 validated singleton error rates of other large-scale sequencing studies<sup>24–26</sup>, and we present evidence  
89 that any such errors are predominantly random across the genome, and are unlikely to be biased by  
90 motif-specific genotyping error (**Supplementary Table 1** and **Supplementary Note 1**).

91

### 92 Context-dependent variability in mutation rates

93 Prior trio sequencing studies have found that the bases immediately adjacent to a mutated site (i.e., a  
94 3-mer sequence context) are an important predictor of variability in mutation rates across the  
95 genome<sup>11,27</sup>. To better understand these patterns of context-dependent variability, we examined the  
96 surrounding sequence of the 36,087,319 ERVs. We first assigned each ERV into one of six basic  
97 mutation types: A>C, A>G, A>T, C>T, C>G, and C>A. Note that each of these types also captures  
98 variants that occur in their reverse complement (e.g., the A>C type contains both A>C and T>G  
99 singletons, the C>T type contains both C>T and G>A singletons, etc.). We then identified the bases in  
100 the reference genome up to 3 positions upstream and downstream from each ERV. Considering all  
101 possible combinations of nucleotides in these positions, the 6 basic mutation types can be subdivided  
102 into  $4^2 \times 6 = 96$  3-mer subtypes,  $4^4 \times 6 = 1,536$  5-mer subtypes, or  $4^6 \times 6 = 24,576$  7-mer subtypes. For each  
103 K-mer subtype, we divide the number of ERVs observed at the central position of the K-mer by the

104 number of times the K-mer is seen in the mappable autosomal regions of the reference genome; we  
105 term this proportion the *estimated relative mutation rate*. For example, we observed 28,615 A>C or  
106 T>G singletons occurring in an AAAAAAA or TTTTTTT 7-mer motif (the underlined base indicates the  
107 variant site) and there are 11,823,995 such motifs in the reference genome where this subtype of  
108 mutation could be observed, yielding a relative mutation rate estimate of  $28,615/11,823,995=0.0024$  for  
109 this 7-mer subtype. In the absence of selection, gBGC, or sequencing artifacts, the relative mutation  
110 rate is proportional to the underlying per-site, per-generation *absolute* mutation rate. We show  
111 estimated relative mutation rates for all possible 1-, 3-, 5-, or 7-mer subtypes in **Figure 1** and  
112 **Supplementary Tables 2a-2d**.

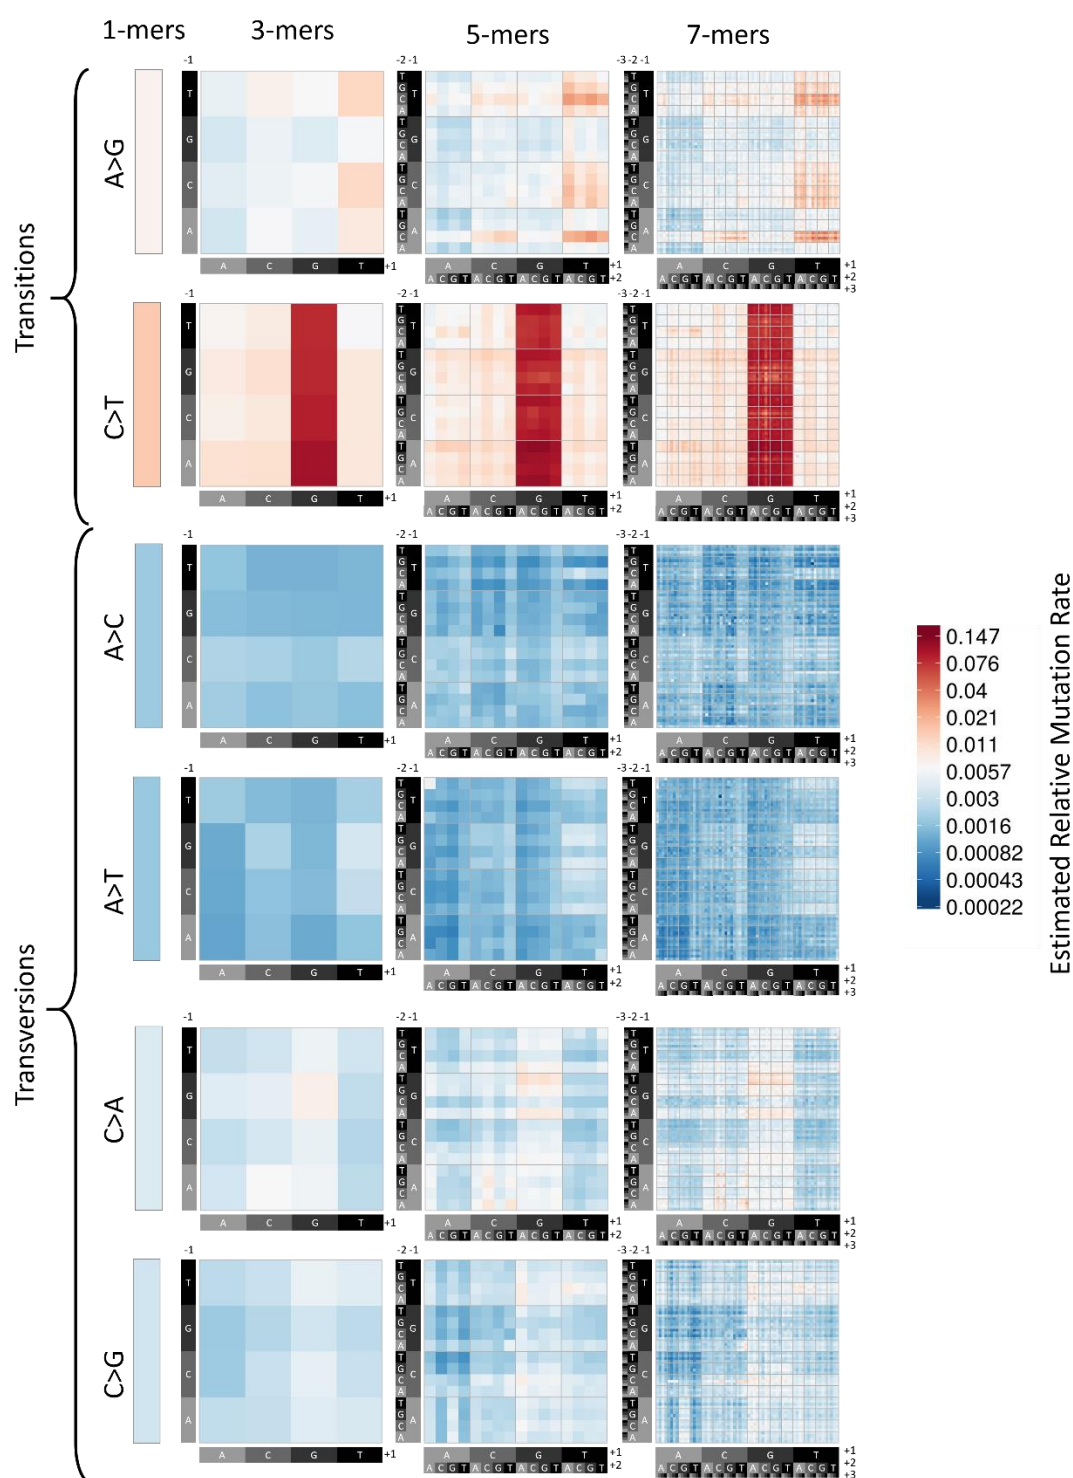

113  
 114 **Figure 1** Heatmap of estimated relative mutation rates for all possible subtypes, defined by local  
 115 sequence context up to a 7-mer resolution. The first column indicates the relative mutation rates for the  
 116 6 basic 1-mer types, and the subsequent columns show these rates stratified by increasingly longer  
 117 sequence context. Each cell delineates a subtype defined by the bases upstream (y-axis) and  
 118 downstream (x-axis) from the central base. Extreme values in the scale (0.00022 and 0.147) indicate  
 119 the observed minimum and maximum estimated relative mutation rates among 7-mers.

120 The 6 basic 1-mer mutation types (**Fig. 1**, first column) distinguish the higher relative mutation  
121 rates of transitions (A>G; 0.0062 and C>T; 0.013) compared to transversions (A>C; 0.0016, A>T;  
122 0.0016, C>A; 0.0034, and C>G; 0.0028). When each 1-mer mutation type is split into its 16 constituent  
123 3-mer subtypes (**Fig. 1**, second column), we identify patterns of within-type mutation rate heterogeneity.  
124 Hypermutable N[C>T]G subtypes are the most prominent, attributable to increased C>T mutation rates  
125 at methylated CpG dinucleotides (relative mutation rate=0.097; 7.4-fold higher than 1-mer C>T relative  
126 mutation rate). Expanding to 5-mer subtypes (**Fig. 1**, third column) reveals additional context-  
127 dependent heterogeneity, for example, among CA[A>G]TN and CT[A>G]TN subtypes (relative mutation  
128 rate=0.024; 3.9-fold higher than 1-mer A>G relative mutation rate). Expansion to 7-mer subtypes (**Fig.**  
129 **1**, fourth column) shows that relative mutation rates is also affected by the bases 3 positions upstream  
130 or downstream from the variant site. A notable example is NTT[A>T]AAA subtypes (relative mutation  
131 rate=0.0098; 6.1-fold higher than 1-mer A>T relative mutation rate). The full range of estimated 7-mer  
132 relative mutation rates spans nearly three orders of magnitude, with the lowest and highest 7-mer rates  
133 differing by 658-fold (lowest: CGT[A>C]TCG; relative mutation rate=0.00022; highest: TTA[C>T]GCA;  
134 relative mutation rate=0.146). Assessing the statistical significance of these differences, we found  
135 overwhelming evidence for all 96 of the 3-mer subtypes for heterogeneity in the relative mutation rates  
136 of their respective 5-mer constituents (all  $P < 10^{-259}$ ). Further, 1462 (95.2%) of the 1536 5-mer  
137 subtypes had significantly heterogeneous rates among their respective 7-mer constituents after  
138 correcting for multiple testing ( $P < 3.3 \times 10^{-5}$ ) (**Materials and Methods**).

139

#### 140 **Increasing subtype granularity improves prediction of *de novo* mutations**

141 If the relative mutation rates for successively longer K-mers reflect genuine context-dependent  
142 heterogeneity of *de novo* mutation rates, then the probability of observing a true *de novo* mutation  
143 should be better predicted by models based on longer K-mers. To test this hypothesis, we fit logistic  
144 regression models using each set of ERV-derived relative mutation rates to estimate mutation  
145 probabilities of 46,813 autosomal *de novo* mutations observed in 1,074 children from the Genomes of



146 the Netherlands (GoNL) and Inova newborn screening (NBS) trio-sequencing studies<sup>9,12</sup> (**Materials and**  
147 **Methods**). Successively more variance (measured as Nagelkerke's pseudo- $R^2$ ) was explained by  
148 models that accounted for longer K-mers, with 8.2%, 13.6%, 14.3%, and 14.5% of the variance in *de*  
149 *novo* mutation rates explained by 1-mer, 3-mer, 5-mer, and 7-mer models, respectively (**Fig. 2a**).  
150 Likelihood ratio tests between successive models indicate that these differences are all statistically  
151 significant (1-mer to 3-mer:  $P < 2.2 \times 10^{-308}$ ; 3-mer to 5-mer:  $P < 2.2 \times 10^{-308}$ ; 5-mer to 7-mer:  $P <$   
152  $6.7 \times 10^{-136}$ ; **Supplementary Table 3a**). We also analyzed each mutation type separately to determine  
153 for which of the mutation types longer K-mers explained more variance. Here, we subdivided the C>T,  
154 C>G, and C>A types into CpG and non-CpG types, and analyzed the resulting 9 basic mutation types.  
155 For all 9 types, the 7-mer model provided a significantly better fit than smaller K-mer models, and  
156 explained 1.03-fold (A>T) to 1.59-fold (CpG>GpG) more variance than the 5-mer model, and 1.10-fold  
157 (A>T) to 4.18-fold (A>C) more variance than the 3-mer model (**Fig. 2b; Supplementary Table 3b**).

158

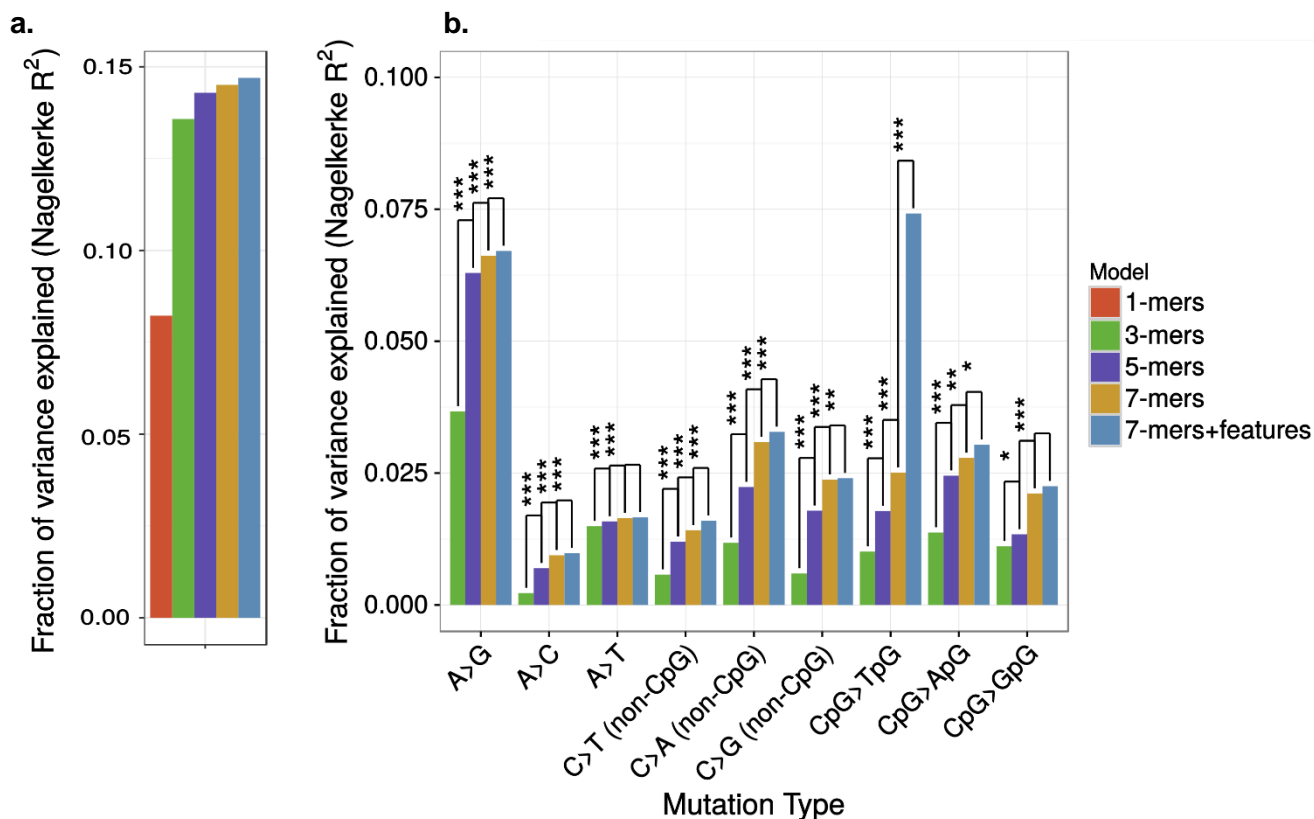

159

160

161

162

163

164

165

166

167

**Figure 2** Comparison of model fit for different ERV-based mutation models. **(a)** Nagelkerke's  $R^2$  for models using 1-mers (6 types), 1-mers with CpGs and non-CpGs considered separately (9 types), 3-mers (96 subtypes), 5-mers (1,536 subtypes), 7-mers (24,576 subtypes), and 7-mers+genomic features across all 9 mutation types combined. (The effect of genomic features is described in a section below.) **(b)** Nagelkerke's  $R^2$  for 3-mer, 5-mer, 7-mer, and 7-mer+genomic features models run separately for each mutation type. The p-value from the likelihood ratio test (with 1 degree of freedom) comparing each model with the next model containing an additional parameter is indicated above each pair of bars (\*\* $P < 0.001$ ; \*\* $P < 0.01$ ; \* $P < 0.05$ ) Exact p-values are reported in **Supplementary Table 3**.

## 168 **Discordant mutation signatures of ERVs and common polymorphisms**

169 Our finding that longer K-mers improve prediction of *de novo* mutations is not unexpected; previous  
170 studies using polymorphism data have demonstrated that local sequence context is an important  
171 predictor of polymorphism rate heterogeneity<sup>7,8,13</sup>. However, estimates derived from common  
172 polymorphisms may not accurately represent the basal mutation processes due to the confounding  
173 effects of selection and gBGC<sup>1</sup>. We compared our ERV-derived 7-mer relative mutation rates to 7-mer  
174 relative mutation rates calculated among 12,088,037 variants with a minor allele count  $\geq 10$  in the  
175 BRIDGES data, which represent ancestrally older variants (hereafter referred to as the “MAC10+” set of  
176 variants). To control for the effects of sample size, we downsampled the 36,087,319 singletons to  
177 12,088,037 and recalculated the 7-mer relative mutation rates on this subset. Across all 24,576 7-mer  
178 mutation types, the ERV-derived and MAC10+-derived relative mutation rates were highly correlated  
179 (Spearman’s  $r=0.99$ ; **Fig. 3a**). When stratified by mutation type, however, we observed much weaker  
180 correlations between the ERV-derived and MAC10+-derived relative mutation rate estimates ( $r=0.45$  to  
181  $0.95$ ; **Fig. 3b**). Under the null hypothesis that neither ERV-derived nor MAC10+-derived rates are  
182 biased, the respective distributions of these rates should be similar. We used Kolmogorov-Smirnov  
183 tests to compare the two distributions of relative mutation rates for each type, and found strong  
184 evidence for each of the 9 types that the two distributions were not equivalent ( $P < 2.3 \times 10^{-5}$ ;  
185 **Supplementary Fig. 1**). Moreover, for every type except A>T transversions, we found that the  
186 discordance between ERV-derived and MAC10+-derived rates was not random with respect to  
187 sequence context, but varied between low-GC motifs (3 or fewer GC bases in flanking region) and high-  
188 GC motifs (4-6 G/C bases in flanking region) (**Fig. 3c; Supplementary Table 4**). This distinction is  
189 particularly strong for A>G transition subtypes ( $P < 2.4 \times 10^{-161}$ ). A>G polymorphisms are known to  
190 occur at a frequency higher than expected under neutral evolution, because gBGC during meiotic  
191 recombination results in preferential transmission of G/C alleles<sup>11,20</sup>. Moreover, gBGC tends to occur  
192 most often in GC-rich DNA<sup>21,28</sup>, consistent with our observation of an excess of GC-rich motifs with >2-  
193 fold higher MAC10+ rates compared to ERV rates (**Supplementary Fig. 2**).

194

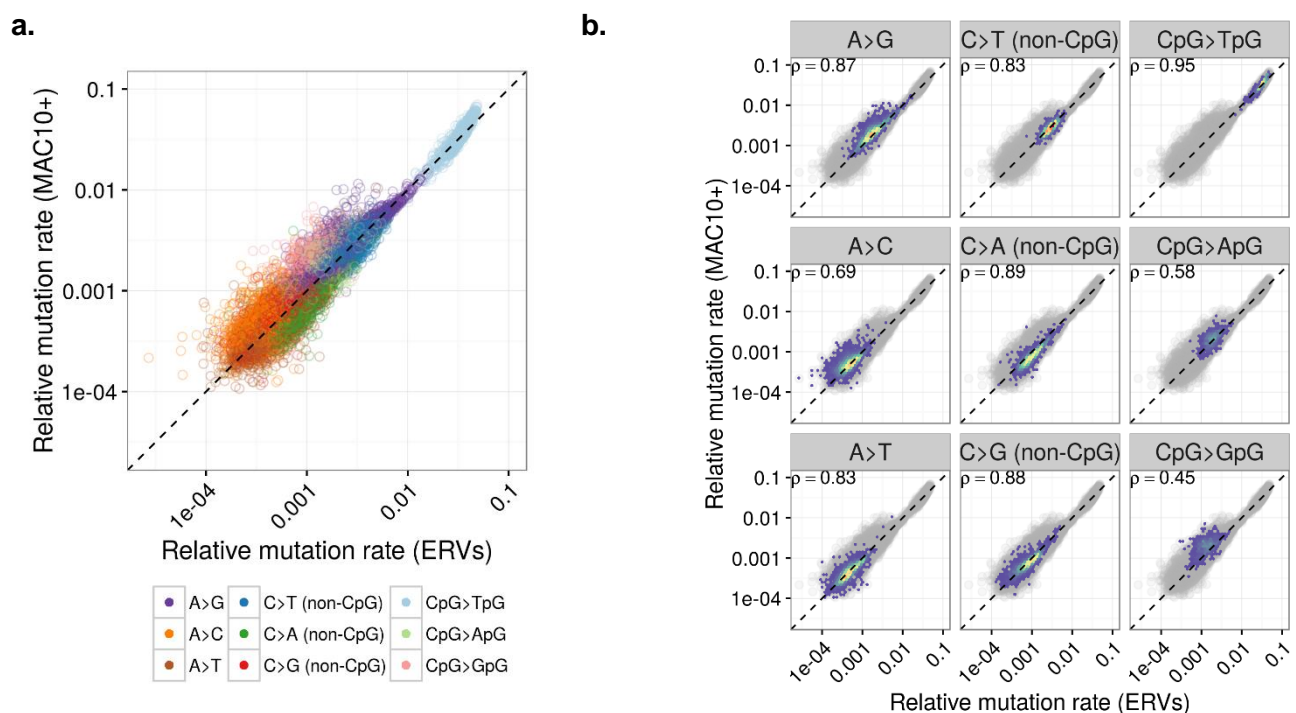

213  
214

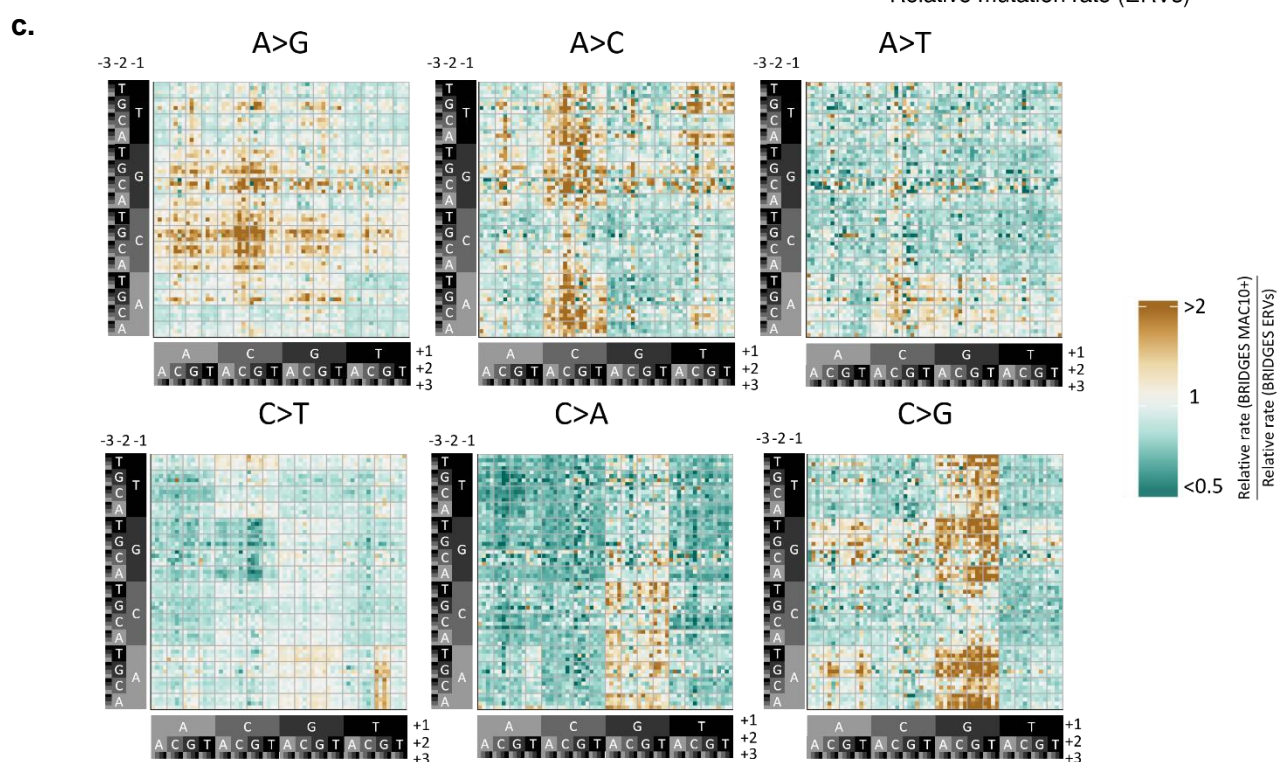

215 **Figure 3 (a)** Relationship between 7-mer relative mutation rates estimated using ERVs (x-axis) and  
 216 variants with a minor allele count  $\geq 10$  (MAC10+; y-axis) on a log-log scale. We note that the strength  
 217 of this correlation is driven by hypermutable CpG>TpG transitions. **(b)** Type-specific 2D-density plots,  
 218 as situated in the scatterplot of **a**. The dashed line indicates an expected least-squares regression line  
 219 if there is no bias present. **(c)** Heatmap shows ratio between relative mutation rates calculated on  
 220 MAC10+ variants and ERVs for each 7-mer mutation subtype. Subtypes with higher MAC10+-derived  
 221 rates relative to ERV-derived rates are shaded gold, and subtypes with lower MAC10+-derived rates  
 222 relative to ERV-derived rates are shaded green.

223 These patterns remained after excluding subtypes with fewer than 50 ERVs or MAC10+ variants, thus  
224 are unlikely to be an artifact of low-frequency subtypes (**Supplementary Fig. 3**). Likewise, the type-  
225 specific MAC10+-derived relative mutation rates were strongly correlated with rates independently  
226 estimated in a previous study based on 7,051,667 intergenic variants observed in 379 European  
227 individuals sequenced by the 1000 Genomes Project<sup>7</sup>, indicating the distribution of ancestrally older  
228 BRIDGES variants is consistent with what we would expect in a similar population (**Supplementary**  
229 **Fig. 4; Supplementary Note 2**). Collectively, these results point to systematic differences in the  
230 estimated context-specific effects between common and rare variants. The two most plausible sources  
231 of such differences are either that 1) even after our careful data cleaning and filtering, the ERV-derived  
232 rates are affected by context-specific sequencing errors, or 2) the MAC10+-derived estimates are under  
233 the influence of non-mutational evolutionary processes that have altered the relative frequencies  
234 among subtypes.

235

### 236 **ERVs predict occurrence of de novo mutations more accurately than MAC10+ variants**

237 To distinguish the origin of these systematic differences, we compare the ability of both sets of rates to  
238 predict *de novo* mutations by fitting logistic regression models to predict the 46,813 autosomal *de novo*  
239 mutations described above, using either the ERV-derived or MAC10+-derived 7-mer relative mutation  
240 rates as predictors (**Materials and Methods**). We reasoned that if ERV-derived rates are biased by  
241 sequencing artifacts, the ERV model will explain less variance in the independent testing data than the  
242 MAC10+ model, whereas if MAC10+-derived rates are biased by evolutionary processes, the ERV  
243 model will explain more variance than the MAC10+ model. Results of this comparison revealed that the  
244 ERV model explains more variance (i.e., higher Nagelkerke's  $R^2$ ) than the MAC10+ model overall  
245 (11.9% vs. 11.4%; **Fig. 4**), and with lower AIC (314,723 vs 316,400; **Supplementary Table 3a**). When  
246 stratifying the *de novo* testing data by the 9 types, the ERV model also explains more within-type  
247 variance than the MAC10+ model (**Supplementary Table 3b**).

248

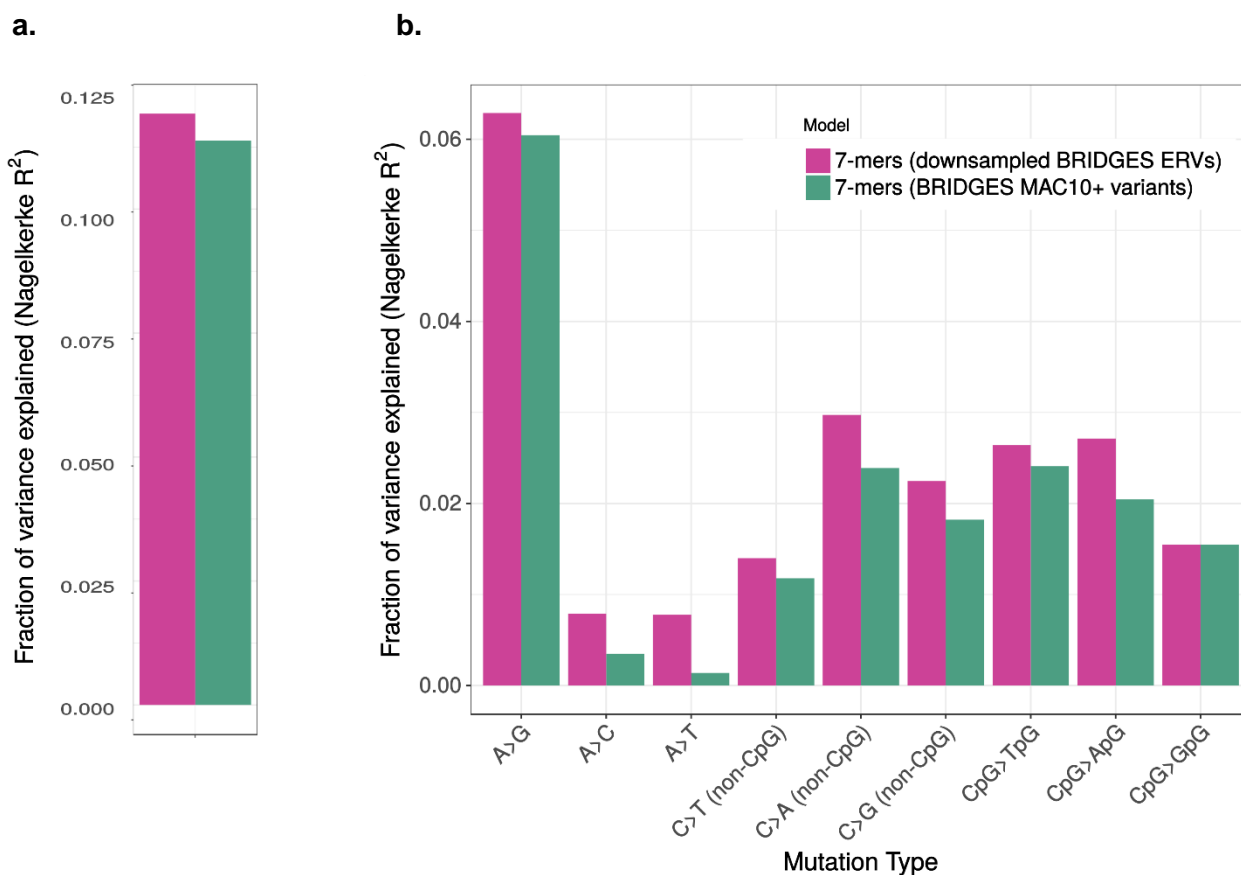

249

250 **Figure 4** Variance in *de novo* mutation rates explained by ERV-derived vs. MAC10+-derived 7-mer  
251 relative mutation rate models, measured as Nagelkerke's  $R^2$  for each model across (a) all mutation  
252 types combined, and (b) stratified by each basic mutation type. Exact values for Nagelkerke's  $R^2$  and  
253 AIC of these models are reported in **Supplementary Table 3**.

## 254 **Effects of genomic features vary by mutation type and sequence context**

255 Family-based sequencing studies have demonstrated that germline mutation rates are associated with  
256 genomic features such as chromatin structure, replication timing, and recombination rate<sup>9,11,27</sup>, but none  
257 of these studies have accounted for the joint influence of multiple features and local sequence context.  
258 To more precisely model how various features influence mutability, we used the BRIDGES ERVs to  
259 jointly estimated the effects of 14 genomic features (**Supplementary Table 5**) on relative mutation  
260 rates across the genome at a single-base resolution (**Materials and Methods**). For each of the 24,489  
261 7-mers with at least 10 ERVs, we estimated the effects of 14 features, resulting in 342,846 parameter  
262 estimates. The distributions of effects for each feature by mutation type shown in **Supplementary Fig.**  
263 **5**. To identify significant effects among the many associations tested, we applied a false discovery rate  
264 (FDR) cutoff of 0.05 to the p-values for each feature across all subtype-specific models. Of the 24,489  
265 7-mer subtypes analyzed, 3,940 had at least one of the 14 genomic features significantly associated  
266 with mutability, with 6,514 significant associations among 342,846 tests. The distributions of these  
267 significant associations, separated by feature and mutation type, are shown in **Fig. 5**. Eleven of the 14  
268 features had a significant association with relative mutation rate for at least one 7-mer; no significant  
269 associations were detected for exons, H3K27ac peaks, or H3K9ac peaks.

270 While seven of the 11 features had consistent directions of effect across all significantly  
271 associated 7-mer subtypes (top two rows, **Fig. 5**), four other features (H3K36me3 peaks, DNase  
272 hypersensitive sites [DHS], GC content, and CpG islands) exhibited bidirectional effects, both within  
273 and between mutation types (bottom row, **Fig. 5**). For a notable example, 99% (1021/1024) of  
274 CpG>TpG 7-mer subtypes are negatively influenced by CpG islands (likely because CpG islands are  
275 generally unmethylated<sup>29</sup>, and thus less likely to mutate). Within five other mutation types, in a small  
276 fraction of subtypes (1.4%), CpG islands were associated with higher relative mutation rates and  
277 among non-CpG C>T subtypes associated with CpG islands, we observe both positive and negative  
278 associations.

279

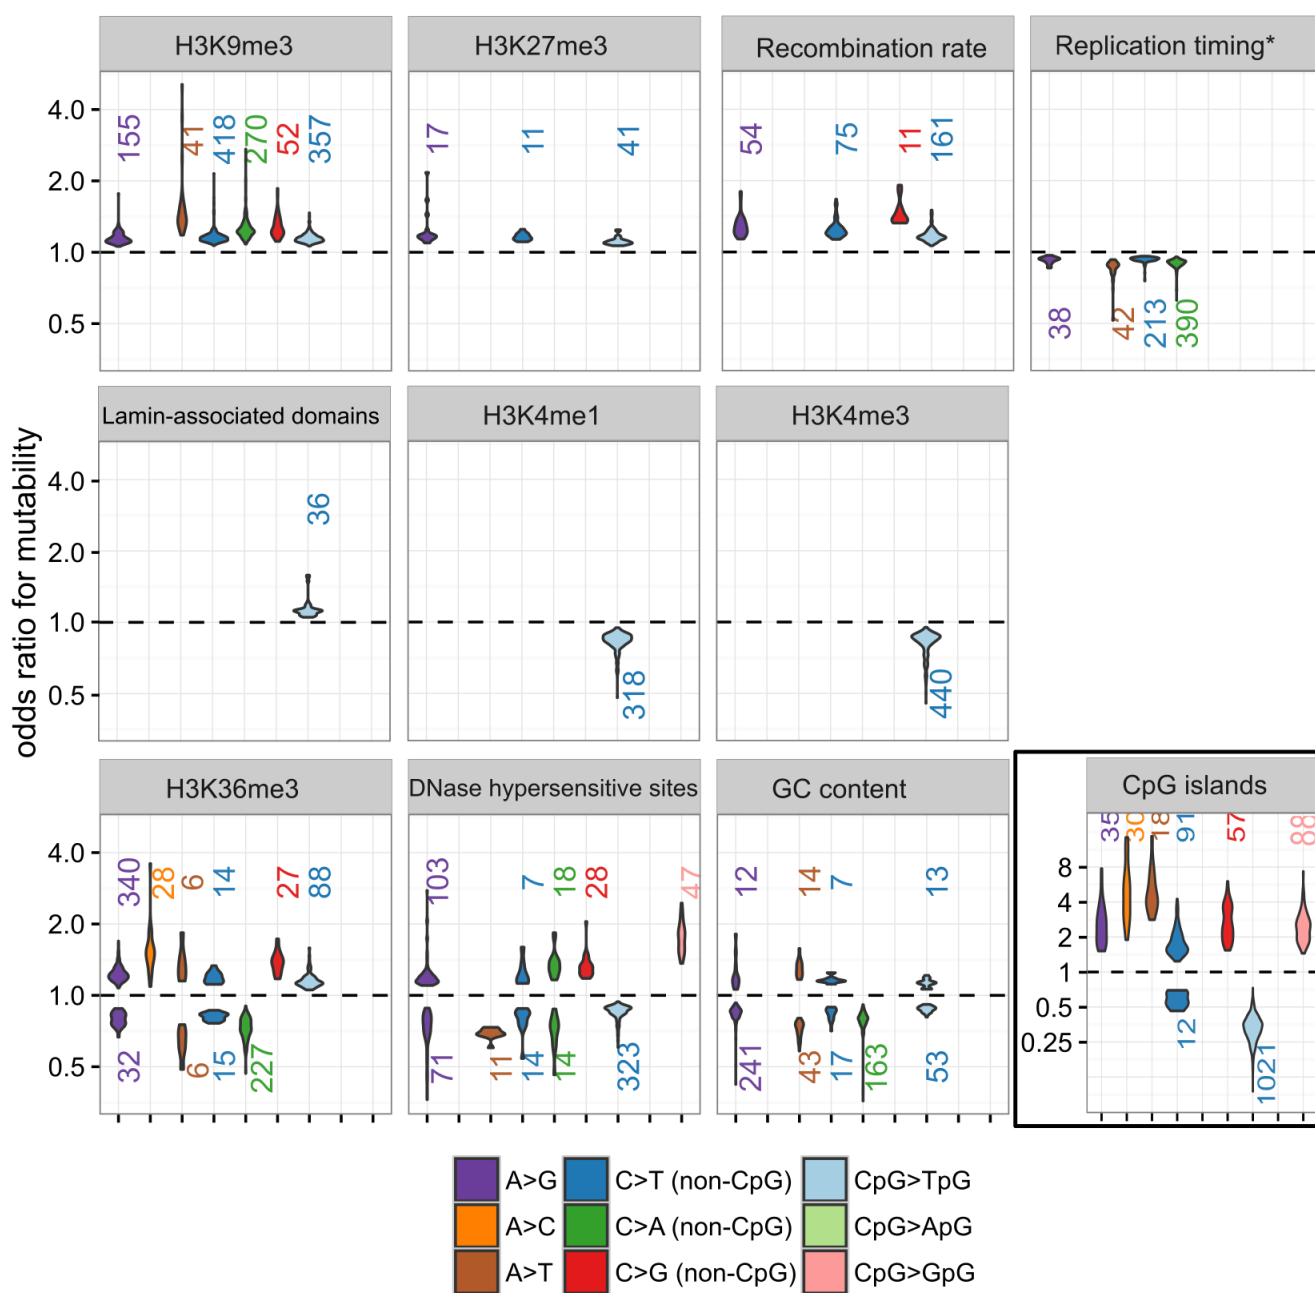

280 **Figure 5** Distributions of significant mutagenic effects for 11 genomic features. For each feature, we  
 281 identified all statistically significant (FDR<0.05) effects among the 24,576 7-mer subtypes, and plotted  
 282 the empirical distributions of these subtype-specific odds ratios for each basic mutation type, separated  
 283 by positive associations (odds > 1; above dashed line) and negative associations (odds < 1; below  
 284 dashed line). The number of 7-mer subtypes within each type for which that feature is statistically  
 285 significant in a positive or negative direction is shown above each or below distribution. Distributions  
 286 are only shown for types with 5 or more 7-mer subtypes associated in the same direction. \*Replication  
 287 timing is coded with negative values indicating later replicating regions, so an OR<1 means mutation  
 288 rate increases in late-replicating regions. Note that effects in CpG islands are shown on a wider scale  
 289 than other features. Odds ratios for the 3 continuous features (recombination rate, replication timing,  
 290 and GC content) indicate the change in mutability per 10% increase in the value of that feature.



## 291 **De novo mutations correlate with local genomic features**

292 To evaluate the importance of accounting for genomic features in mutation rate models, we used the  
293 relative mutation rates estimated from 7-mers and genomic features to predict the 46,813 *de novo*  
294 mutations from the GoNL<sup>9</sup> and Inova NBS<sup>12</sup> studies. We compared model fit statistics (likelihood ratio  
295 test, AIC, and Nagelkerke's  $R^2$ ) between this 7-mer+features model and the 7-mer-only model  
296 (**Materials and Methods**). The 7-mer+features model explained significantly more variation in the *de*  
297 *novo* mutations than the 7-mer-only model, both overall ( $P = 3.1 \times 10^{-147}$ ; **Fig. 2a; Supplementary**  
298 **Table 3a**) and within 6 of the 9 basic mutation types ( $P < 0.05$ ), except for A>C transversions ( $P =$   
299 0.38), CpG>ApG transversions ( $P = 0.18$ ), and CpG>GpG transversions ( $P = 0.08$ ) (**Fig. 2b;**  
300 **Supplementary Table 3b**). Including genomic features had the largest effect on the prediction of  
301 CpG>TpG transitions, and nearly tripled the variance explained by the 7-mer-only model (7-mers-only:  
302 2.7%; 7-mer+features: 7.5%;  $P < 7.23 \times 10^{-108}$ ).

303 These models evaluate the aggregate effects of genomic features, but do not confirm the  
304 specific effects of individual features described in **Fig. 5**. To address this, we examined each of the 15  
305 features across all 7-mer subtypes that showed significant increase or decrease in mutation rate when  
306 associated with that feature in the ERV data, and tested for a corresponding enrichment or depletion of  
307 true *de novo* mutations in genomic regions where that feature is present (**Supplementary Note 3**). Of  
308 the 15 tests performed, 10 showed significant enrichment or depletion of *de novo* mutations within  
309 genomic regions predicted to affect mutability (**Supplementary Table 6**).

## 310 **Context-dependency reveals potential mechanisms of hypermutability**

312 These patterns of fine scale variability can indicate previously unknown context-dependent mutation  
313 mechanisms in the germline. Here we describe two examples. Recent studies of various cancers  
314 revealed an elevated somatic mutation rate in transcription factor binding sites within DNase  
315 hypersensitive sites (DHS), likely caused by inhibition of nucleotide excision repair machinery<sup>30-32</sup>. One  
316 of the most common binding targets in the genome is the CCAAT motif, which is targeted by a family of

317 transcription factors known as CCAAT/Enhancer Binding Proteins (CEBPs)<sup>33</sup>. Because CEBP binding  
318 sites were found to be significantly enriched for somatic mutations in multiple cancer types<sup>30</sup>, we  
319 hypothesized that a similar mechanism may be operative in the germline. Adjusting for other genomic  
320 features, our model indeed shows DHS are significantly enriched for A>G (but not A>C or A>T)  
321 singletons at five of the 16 possible CCAATNN motifs (1.1 to 1.3-fold enrichment;  $P < 9.3 \times 10^{-4}$ ),  
322 indicating that transcription factor binding may also associate with increased mutability in the germline.

323 A second example are 5'-TTAAAA-3' hexamer motifs, which harbor A>T mutations at a rate  
324 ~6.1-fold higher than the background (1-mer) A>T rate (**Supplementary Table 2d**). In ATTAAAA or  
325 TTTAAAA motifs occurring in DNase hypersensitive sites, however, the mutation rate is reduced by  
326 over 3-fold ( $P < 2.8 \times 10^{-22}$ ). This TTAAAA hexamer is a common insertion target for LINE-1  
327 retrotransposons and *Alu* elements<sup>34</sup>, and is known to be nicked by L1 endonuclease (L1 EN) at the  
328 A/T dinucleotide, even when no retrotransposition takes place<sup>35</sup>. Moreover, the rate of L1 EN-induced  
329 damage has been shown to vary according to the nucleosomal context of target motifs<sup>36</sup>, consistent  
330 with the DHS association detected by our model. Overall, this pattern of sequence- and feature-  
331 dependent mutability suggests that L1 EN nicks are mutagenic, resulting in A>T transversions. A more  
332 detailed analysis of the potential sources behind this mutation signature is presented in  
333 **Supplementary Note 4**.

334

## 335 Discussion

336 Our results highlight the relationship between a site's genomic context and likelihood of mutation, and  
337 demonstrate the importance of accounting for adjacent nucleotides, genomic features, and their joint  
338 effects in mutation models. Though prior family-based studies have shown that di- and tri-nucleotide  
339 motifs are predictive of mutation<sup>9,11,27</sup>, the density of singletons in our dataset enables an even more  
340 granular description of sequence specificity, with a combination of bases up to 3 positions upstream  
341 and/or downstream from a given site influencing that site's mutability. Collectively, these results  
342 suggest that the nucleotides up to 3 positions away from a mutation site are a nontrivial source of

343 mutation rate heterogeneity, and even more distal nucleotides may have an appreciable effect on  
344 mutability.

345 Mutation probabilities of heptameric motifs have been catalogued by others using variants  
346 across the entire frequency spectrum<sup>7</sup>, but we show that exclusively using the rarest variants results in  
347 more accurate inference of context-dependent *de novo* mutation patterns. This result has two important  
348 implications. First, we conclude that variants that occur at higher frequency are likely subject to biased  
349 evolutionary processes. Second, any cryptic biases in sequencing that affect detection of ERVs are  
350 relatively weak in comparison to evolutionary biases. This is most clearly exemplified in our observation  
351 of increased A>G polymorphism rates: this pattern is consistent with known effects of gBGC, and  
352 supports the conclusion that mutation models based on older variants are affected by evolutionary  
353 biases.

354 Building upon previous attempts to holistically model the relationship between sequence  
355 context, genomic features, and mutation rate<sup>9,27</sup>, we extend our 7-mer model to account for the  
356 potential mutagenicity of multiple genomic features. Our model both confirms the presence of known  
357 feature-associated effects (such as a higher mutation rate in late-replicating regions<sup>9</sup>), and identifies  
358 additional associations (such as the bidirectional effects found in DHS and CpG islands). Moreover, we  
359 describe how such effects vary between and within mutation types according to local sequence context,  
360 providing new insight into how the genomic landscape shapes the mutation rate. These results suggest  
361 that a single genomic feature may act to both suppress and promote mutability of different mutation  
362 types and, in some cases, the direction of the effect can vary between different sequence motifs of the  
363 same basic mutation type. These findings may be used to generate additional testable hypotheses for  
364 how and where specific mutation mechanisms act in the genome.

365 We note that power to detect feature-associated mutability was in some cases limited by the  
366 number of ERVs of a given 7-mer subtype; 93% of the 6,514 significant associations were detected in  
367 7-mer subtypes with more than 741 ERVs (the median number of ERVs per 7-mer subtype). Although  
368 we show genomic features to associate with observed patterns of mutation, the features used in our

369 model are a generic approximation of the genomic landscape in germ cells, and cannot account for  
370 changes to the genomic features through different stages of gametogenesis<sup>11</sup>. Additionally, because  
371 ERVs in our model reflect mutations that have occurred in both males and females over dozens of  
372 generations, we are unable to model sex-specific mutation rate heterogeneity or parental age  
373 effects<sup>9,12,37</sup>. Prediction of *de novo* mutations will almost certainly be improved by accounting for these  
374 temporal and cellular sources of variability.

375         Despite these limitations, our model describes patterns of mutability at an unprecedented level  
376 of detail, and with greater accuracy than previous models. The catalog of predicted single-base  
377 mutation rates we have generated can be integrated easily into existing analysis and simulation  
378 pipelines. To better incorporate this mutation rate map, we have developed a utility to annotate  
379 genomic variants with the estimated mutation rate, and generated a genome browser track to visualize  
380 predicted mutation rates alongside other genomic data. We envision a variety of applications for this  
381 data resource: for example, single-base mutation rates can be aggregated over an entire gene or  
382 regulatory locus to accurately estimate the number of mutations in "typical" individual. This is a crucial  
383 step in identifying which functional elements might be disrupted by *de novo* mutations in affected  
384 cases<sup>38</sup>. Pathogenicity scoring algorithms such as CADD<sup>39</sup> that rely on comparisons between observed  
385 and simulated variants can potentially benefit by adopting a context-dependent simulation model.  
386 Moreover, we expect that the analytical framework presented here will serve as a baseline for  
387 understanding mutation rate heterogeneity and its consequences, providing insight into both the history  
388 and future of human evolution and genetic diseases.

389 **Acknowledgements**

390 Funding for this research was provided by US National Institutes of Health (NIH) US National Institutes  
391 of Health grant R01HG005855 (S.Z. and J.L.). J.C. was supported by the NIH/National Human Genome  
392 Research Institute Genome Science Training Program (T32HG00040). The BRIDGES study was  
393 supported by NIH grants R01MH094145 (M.B., R.M.M.) and U01MH105653 (M.B.). Additional  
394 acknowledgements from collaborating members of the BRIDGES consortium are detailed in the  
395 **Supplementary Information.**

396

397 **Author contributions**

398 J.C., J.L., and S.Z. designed the models and wrote the manuscript. J.C. performed the analyses and  
399 created the online annotation utility and interactive heatmap. L.S., M. B., and H.M.K. provided critical  
400 feedback and evaluation of the manuscript. A.L., M.F., and H.M.K. performed variant calling and  
401 filtering of the BRIDGES samples and curated the raw data. Sequencing was led by S.L. and R.M.

## 402 **Methods**

403 **Sample description.** The BRIDGES sample contains 3716 European American bipolar disorder (BD)  
404 cases and controls. In all studies, DNA was extracted from blood-based samples. The BD cases and  
405 controls from the Centre for Addiction and Mental Health (CAMH) in Toronto (n=801) and from the  
406 Institute of Psychiatry, Psychology and Neuroscience (IoPPN), King's College London in London, U.K  
407 (n=817) were collected as previously described<sup>40</sup>. The BD cases and controls were collected as  
408 previously described for the Genomic Psychiatry Cohort (GPC) (n=1,079)<sup>41</sup> and the Prechter Repository  
409 (n=296)<sup>42</sup>. The STEP-BD BD cases (n=302), obtained from the NIMH repository, were collected as  
410 previously described<sup>43</sup>. Control samples were obtained from the Minnesota Center for Twin and Family  
411 Research (MCTFR) study (n=421)<sup>44</sup>. All human research was approved by the relevant institutional  
412 review boards and conducted according to the Declaration of Helsinki. All participants provided written  
413 informed consent.

414

415 **Sample quality control and library preparation.** The concentration of each DNA sample  
416 was measured by fluorometric means (PicoGreen, Thermo Fisher, Woburn, MA, USA) followed by  
417 agarose gel electrophoresis to verify the integrity of DNA. Six-hundred nanograms of DNA was sheared  
418 with acoustic shearing (Covaris, Woburn, MA, USA) to an average size of 400nt. Following shearing,  
419 the samples are transformed to a sequencing library using standard protocols to create a paired-end  
420 library. Briefly, sheared DNA was end-repaired, A-tailed and ligated with Illumina adaptors (New  
421 England Biolabs, Ipswich, MA, USA). Following ligation, indexed primers were used to amplify the final  
422 libraries for each sample. Each sample received two indexes: 96 i7 indexes were used to identify each  
423 sample in each 96-well reaction plate while a single i5 index was used for each plate. This combination  
424 of indexes uniquely coded all samples in the project when both the i7 and i5 indexes were read at  
425 during sequencing. Following six cycles of PCR (Kapa Biosystems, Wilmington, MA, USA), libraries  
426 were purified and quality controlled by assaying the final library size using the Agilent Bioanalyzer  
427 (Agilent Technologies, Santa Clara, CA, USA) and quantitating the final library via real-time PCR

428 (Kappa Biosciences). A single peak between 300-400bp indicates a properly constructed and amplified  
429 library ready for sequencing. PCR cycles for amplification are kept to a minimum to minimize PCR  
430 duplication rate and maximize library complexity.

431

432 **Sequencing.** Sequencing was performed per Illumina protocol, essentially as described by Bentley et  
433 al.<sup>45</sup>. Libraries were pooled in sets of 12 samples and each pool sequenced on a single lane of a HiSeq  
434 2500 flowcell using version 3 Illumina chemistry at paired-end 100nt read lengths. Each library pool  
435 was loaded at 13pM to generate 160-180M paired reads per lane. Multiple flowcells of the library pools  
436 were performed to generate a final data set corresponding to 5-12x genome coverage per sample  
437 (Average coverage 9.6x). Reads were mapped to Build 37 of the human reference genome, with decoy  
438 sequence<sup>24</sup>. Alignment and variant calling were performed using the GotCloud pipeline<sup>46</sup>.

439

440 **Identification of singleton variants.** We identified 36,087,319 singleton variants, including 314 that  
441 occurred at 157 multiallelic sites (i.e., two singletons occurring at the same site but representing two  
442 different alternative alleles. Notably, these all occurred at tetrallelic sites where the third non-reference  
443 allele was a non-singleton variant). All downstream analyses included these multiallelic singletons as  
444 independent observations. To assess the quality of singleton variants, we compared quality metrics  
445 between this full set of singletons with a more stringently filtered subset of singletons, including only  
446 singletons with a variant quality score  $\geq 30$ , average mapping quality score  $> 56$ , and falling in the 1000  
447 Genomes Strict Accessibility Mask generated by the 1000 Genomes Project, which restricts variant  
448 calls to the most uniquely mappable regions of the genome, comprising 72% of non-N bases<sup>47</sup>.

449 We compared data quality measures (Ts/Tv ratio and % in dbSNP, build 142) both before and  
450 after applying these filters (**Supplementary Table 1**). The transition:transversion ratio (Ts/Tv) is a  
451 commonly used diagnostic to assess the overall quality of variant calls from sequencing data. Prior  
452 studies have suggested a Ts/Tv between 2.00 and 2.10 is to be expected for true variants in genome-  
453 wide datasets<sup>48</sup>, whereas this ratio is close to 0.5 for random errors. Without downstream filters, the full

454 set of singletons have Ts/Tv ratio 2.02, compared to 2.00 for singletons within the strict filter set. If we  
455 assume the Ts/Tv of true positive singletons is between 2.00 and 2.10, our observed Ts/Tv of 2.02  
456 corresponds to a false positive rate of 0.6% to 2.6% (details described in **Supplementary Note 5**). We  
457 may also estimate a false negative rate by analyzing the site frequency spectrum. Multiple sequencing  
458 studies have reported an abundance of rare variants, particularly singletons, in European populations,  
459 consistent with a model of recent faster-than-exponential population growth; in these studies, singletons  
460 comprise 50-60% of all observed single-nucleotide variants<sup>49,50</sup>. In the BRIDGES data, singletons  
461 comprise 56.8% of all variants (36,087,319 of 63,566,013). If we assume 2.6% of these singletons are  
462 false positives, and further assume that non-singletons are all true positives, 55.3% of variants would  
463 be true singletons, consistent with the proportion of variants reported to be singletons in the ExAC  
464 exome sequencing study (54%)<sup>51</sup>, suggesting a low false negative rate for singletons in the BRIDGES  
465 data.

466         Although these estimates suggest that most singletons are high-quality calls, specific sources of  
467 bias may occur, such as 1) error-prone sequence motifs may have an excess of false positives, leading  
468 to overestimated mutation rates for the corresponding mutation subtypes; or 2) true variants that are  
469 incorrectly mapped may confound our analysis of the relationship between genomic features and  
470 mutation. We discuss in **Supplementary Note 1** why these concerns are unlikely to have made a  
471 strong contribution to the main findings. Hence, we decided to use the full set of singletons (rather than  
472 the stringently filtered subset) in our analyses.

473  
474 **Mutation subtypes and subtype-specific relative mutation rates.** We assigned each of the  
475 36,087,319 singletons into one of 6 basic mutation types: A>C, A>G, A>T, C>T, C>G, and C>A. Where  
476 applicable, we separated C>T, C>G, and C>A mutations into CpG and non-CpG types (for a total of 9  
477 basic mutation types), to account for the known hypermutability of cytosine at CpG dinucleotides<sup>52,53</sup>.  
478 The notation of A>C includes both A-to-C mutations and complementary T-to-G mutations. For each  
479 mutation type, we further define a set of mutation subtypes by the bases flanking the variant site. Since



480 there are 4 possible bases at both the +1 position and the -1 position, there are  $4 \times 4 = 16$  possible 3-  
481 mers containing each basic mutation type at the central position, producing  $6 \times 16 = 96$  3-mer subtypes.  
482 Likewise, there are  $6 \times 4^4 = 1,536$  5-mer subtypes, and  $6 \times 4^6 = 24,576$  7-mer subtypes.

483 For every subtype, we calculate a genome-wide relative mutation rate as the observed number  
484 of singletons of that subtype divided by the number of K-mers in the accessible reference genome that  
485 could generate that subtype. K-mers in the reference genome were counted by a 1-bp sliding window,  
486 so that every possible K-mer was accounted for (e.g., a run of 4 As is counted as two AAA 3-mers  
487 shifted by one base). For simplicity, we denote a subtype by the sequence motif containing either an A  
488 or a C as the reference base at the central position (e.g., either CGT[A>X]TCG or CGT[C>X]TCG). As  
489 each K-mer can be split into 16 possible (K+2)-mers that share the same internal motif but differ in their  
490 terminal bases, the relative mutation rate for each K-mer subtype is the weighted mean of the rates  
491 found among its 16 possible (K+2)-mer constituent subtypes. To assess the heterogeneity of relative  
492 mutation rates among each set of 16 (K+2)-bp constituent subtypes that share the same K-bp motif, we  
493 performed a chi-squared test for uniformity of these rates, with each test having 15 degrees of freedom.  
494 We applied Bonferroni correction to account for the multiple testing burden of this procedure, and  
495 considered a test to be statistically significant if  $P < \frac{0.05}{N}$ , where N is the number of tests (i.e., N=96  
496 when testing for heterogeneity of each 3-mer subtype's constituents, and N=1,536 when testing for  
497 heterogeneity of each 5-mer subtype's constituents).

498

499 **Mutation prediction model and validation.** We used these ERV-derived relative mutation rate  
500 estimates as predictors in a series of logistic regression models to determine if longer sequence context  
501 more accurately described the observed distribution of true *de novo* mutations. The dependent variable  
502 in the logistic regression models was whether or not a site was one of 46,813 *de novo* mutations  
503 identified by two independent studies: 11,020 *de novo* mutations detected in 258 Dutch families by the  
504 Genomes of the Netherlands (GoNL) project<sup>9</sup>, and 35,793 *de novo* mutations from 816 families  
505 sequenced by the Inova Newborn Screening Cohort<sup>12</sup>. These observed mutations were combined with

506 1 million randomly selected sites from the mappable autosomal regions of the reference genome to  
507 serve as a non-mutated background. Because each non-mutated site can be ambiguously considered  
508 as the background for 3 different mutation types, we divided the 1 million non-mutated sites into 3 non-  
509 overlapping sets. We designated A/T and C/G reference bases in the first set (consisting of 333,334  
510 unique sites) as non-mutated A>G and C>T types, respectively, and so on for the second set (A>C or  
511 C>G types), and the third set (A>T or C>A types), each of which contained 333,333 unique sites. So,  
512 we consider a total of 1,046,813 testing sites (1,000,000 unmutated sites and 46,813 *de novo*  
513 mutations), each with one possible mutation event, in our prediction models.

514 Now let  $i = \{1, \dots, 1,046,813\}$  be an index for the 1,046,813 testing sites. We coded  $D_i = 1$  if  
515 site  $i$  is a *de novo* mutation and  $D_i = 0$  otherwise. We then annotated each of the testing sites with four  
516 quantities, according to the site's sequence context: 1)  $R_1$ =the 1-mer relative mutation rate 2)  $R_3$ =the  
517 difference between the 3-mer relative mutation rate and 1-mer relative mutation rate, 3)  $R_5$ =the  
518 difference between 5-mer relative mutation rate and 3-mer relative mutation rate, and 4)  $R_7$ =the  
519 difference between 7-mer relative mutation rate and 5-mer relative mutation rate, so the overall  
520 estimated 7-mer relative mutation rate for site  $i$  can be decomposed into  $R_{i,1} + R_{i,3} + R_{i,5} + R_{i,7}$ . Then  
521 we can assess how well the estimated relative mutation rates for the 7-mer model predict the observed  
522 mutation rates by fitting the logistic model:

$$523 \quad \ln \left( \frac{P(D_i = 1)}{P(D_i = 0)} \right) = \alpha_0 + \alpha_1 R_{i,1} + \alpha_3 R_{i,3} + \alpha_5 R_{i,5} + \alpha_7 R_{i,7} \quad (1)$$

524 and calculating the maximized likelihood. We can similarly assess the 5-mer, 3-mer, and 1-mer models  
525 by removing all terms of a higher order than the specified K-mer from the logistic model (1). We  
526 structured models in this way so that each K-mer model is nested within the next (K+2)-mer model,  
527 enabling us to statistically evaluate model fit using a likelihood ratio test (each successive test between  
528 a K-mer model and (K+2)-mer model having 1 degree of freedom). We also compared model fit using  
529 Nagelkerke's  $R^2$  as a measure of variance in *de novo* mutation rates explained.

530 Because these models evaluate trends jointly across the basic mutation types, they do not  
531 provide information about which types benefit most strongly from using expanded sequence motifs. For  
532 example, it is possible that any improvement to the overall model fit is elicited by context-dependent  
533 heterogeneity of a single mutation type, whereas other types might not be significantly affected by using  
534 longer sequence motifs, and do not contribute to the improved model fit. To identify these type-specific  
535 trends, we stratified our testing data by each of the 9 basic types, and for each type, repeated the 3-  
536 mer, 5-mer, and 7-mer models on only the sites of that type. Within each set of type-specific models,  
537 we again used likelihood ratio tests to evaluate if relative mutation rates estimated in longer K-mers  
538 result in significantly better prediction of *de novo* mutations. We also calculated Nagelkerke's  $R^2$  to  
539 quantify the amount of within-type variability explained by a given model.

540

541 **Comparison of ERV and polymorphism models.** To compare the ERV-derived, MAC10+-derived,  
542 and 1000 Genomes-derived<sup>7</sup> 7-mer mutation rates, we applied a logistic modeling framework similar to  
543 equation (1). Because the 1000 Genomes-derived rates are only available for 7-mers<sup>7</sup>, we used only  
544 the respective 7-mer relative mutation rate as a single predictor in each model, without decomposing  
545 into four separate components. Each of these models was applied to predict the probability of a *de*  
546 *novo* mutation at each of the 1,046,813 testing sites. These 7-mer models are based on different sets  
547 of predictors and are not nested, so their relative performance cannot be assessed with a likelihood  
548 ratio test; instead, we compared model fit with Akaike Information Content (AIC) and Nagelkerke's  $R^2$ .

549

550 **Estimating the effect of local genomic features.** We estimated the effect of 14 genomic features  
551 (data sources for these features are described in **Supplementary Table 5**) on the relative mutation rate  
552 of each 7-mer subtype using the modeling framework described below. Let  $\mathbf{K}$  be the index across all 7-  
553 mer subtypes with more than 10 observed singletons ( $\mathbf{K} \in \{1, \dots, 24, 489\}$ ). Let  $\mathbf{j}_K$  be the index across  
554 all sites that are centered at the 7-mer motif that could produce a mutation of subtype  $\mathbf{K}$ , and let  $\mathbf{Z}_{j_K} = \mathbf{1}$   
555 if the site carries a singleton of subtype  $\mathbf{K}$  and  $\mathbf{Z}_{j_K} = \mathbf{0}$  otherwise. We annotated each site of the

556 considered subtype for 14 genomic features, generating predictors  $F_{j_K,1}, \dots, F_{j_K,14}$ . For 11 binary  
557 features (broad histone peaks [H3K4me1, H3K4me3, H3K9ac, H3K9me3, H3K27ac, H3K27me3,  
558 H3K36me3], lamin-associated domains, CpG islands, DNase hypersensitive sites, exons), we set the  
559 predictor  $F_{j_K,g} = \mathbf{1}$ ,  $g \in \{\mathbf{1}, \dots, \mathbf{11}\}$  if the central site of the motif was inside the specified regions and  
560  $F_{j_K,g} = \mathbf{0}$  otherwise. For the 3 continuous features (recombination rate, replication timing, surrounding  
561 GC content), we set the predictor  $F_{j_K,g}$ ,  $g \in \{\mathbf{12}, \mathbf{13}, \mathbf{14}\}$  to the mean value of that feature in a 10kb  
562 window centered at the site. To avoid confounding effects of genomic features like GC content with the  
563 effect of read depth, we included read depth at the central site of the 7-mer as covariate  $F_{j_K,DP}$ . We  
564 then evaluated the effect of the genomic predictors on the relative mutation rate of 7-mer subtype  $K$   
565 using the following logistic regression equation:

$$566 \quad \ln \left( \frac{P(Z_{j_K} = \mathbf{1})}{P(Z_{j_K} = \mathbf{0})} \right) = \beta_0^K + \beta_1^K F_{j_K,1} + \dots + \beta_{14}^K F_{j_K,14} + \beta_{DP}^K F_{j_K,DP}$$

567 Where  $(\beta_1^K, \dots, \beta_{14}^K)$  are effects of the 14 considered genomic features on the mutation rate of subtype  
568  $K$ , and  $\beta_{DP}^K$  is the effect of the local sequencing depth. The intercept of this model,  $\beta_0^K$ , represents the  
569 feature-adjusted relative mutation rate for the considered 7-mer subtype. We estimated the beta  
570 parameters of each model in R v3.2.3 by fitting a generalized linear model with the `speedglm()` function  
571 from the `speedglm` package, which directly solves the system of regression equations using an  
572 iteratively reweighted least squares algorithm. We performed this procedure for each of the  $K \in$   
573  $\{\mathbf{1}, \dots, \mathbf{24}, \mathbf{489}\}$  7-mer subtypes; the resulting beta values and standard errors for 16 x 24,489 estimated  
574 parameters are provided in **Supplementary Table 7**.

575 To generate a map of mutation rates across the genome, we used the estimated regression  
576 coefficients  $(\hat{\beta}_0^K, \hat{\beta}_1^K, \dots, \hat{\beta}_{14}^K, \hat{\beta}_{DP}^K)$  to predict the relative mutation rate (i.e., probability of observing a  
577 singleton) at each site  $j$  where a mutation of a given 7-mer subtype could occur. Because there are  
578 three possible mutations at every base, we predict 3 independent mutation probabilities (one for each  
579 possible allele). For example, for a site centered at ACGATTG motif, we predict probabilities for A>C,  
580 A>G, and A>T alleles, using the parameters estimated from those models. This prediction uses all

581 estimated effects, not just the effects determined to be statistically significant. We also note that we did  
582 not generate predictions for sites within 5 megabases of the start/end of a chromosome, since  
583 recombination rate data were not available for these regions<sup>54</sup>.

584 To assess if inclusion of these genomic features improved the prediction of *de novo* mutations  
585 over the 7-mers-only model, we again tested this model's ability to predict the known *de novo* mutations  
586 from the GoNL<sup>9</sup> and Inova NBS<sup>12</sup> studies. We annotated each of the  $i = \{1, \dots, 1,046,813\}$  testing sites  
587 with the quantity  $R_{i,L}$ =the difference between 7-mers+features relative mutation rate and 7-mer relative  
588 mutation rate at each site, and added this parameter to the 7-mer model. We compared these models  
589 to the 7-mer-only models again using a likelihood ratio test (with 1 degree of freedom), AIC, and  
590 Nagelkerke's  $R^2$ .

591  
592 **Data availability.** We are in the process of submitting the BRIDGES sequence-based genotypes to  
593 dbGaP. K-mer-based relative mutation rate estimates are provided in **Supplementary Table 2**.  
594 Predicted mutation rates based on sequence context and genomic features at each site are available in  
595 a compressed wiggle (bigwig) format for use with the UCSC Genome Browser, and can be accessed at  
596 <http://mutation.sph.umich.edu>.

597  
598 **Code availability.** The GotCloud mapping and variant calling pipeline can be accessed at  
599 <http://genome.sph.umich.edu/wiki/GotCloud>. All custom scripts used in downstream data processing  
600 and analyses are available at <https://github.com/carjed/smaug-genetics>. A web-based utility and  
601 command-line code for annotating genetic variants with estimated 7-mer mutation rates can be  
602 accessed at <http://www.jedidiahcarlson.com/mr-eel/>.

603  
604

605

## References

- 606 1. Ségurel, L., Wyman, M. J. & Przeworski, M. Determinants of mutation rate variation in the human  
607 germline. *Annu. Rev. Genomics Hum. Genet.* **15**, 47–70 (2014).
- 608 2. Li, H. A statistical framework for SNP calling, mutation discovery, association mapping and  
609 population genetical parameter estimation from sequencing data. *Bioinformatics* **27**, 2987–2993  
610 (2011).
- 611 3. Li, H. & Durbin, R. Inference of human population history from individual whole-genome  
612 sequences. *Nature* **475**, 493–496 (2011).
- 613 4. Nielsen, R. *et al.* Genomic scans for selective sweeps using SNP data. *Genome Res.* **15**, 1566–  
614 1575 (2005).
- 615 5. MacArthur, D. G. *et al.* Guidelines for investigating causality of sequence variants in human  
616 disease. *Nature* **508**, 469–476 (2014).
- 617 6. Zhang, W., Bouffard, G. G., Wallace, S. S. & Bond, J. P. Estimation of DNA sequence context-  
618 dependent mutation rates using primate genomic sequences. *J. Mol. Evol.* **65**, 207–214 (2007).
- 619 7. Aggarwala, V. & Voight, B. F. An expanded sequence context model broadly explains variability  
620 in polymorphism levels across the human genome. *Nat. Genet.* **48**, 349–55 (2016).
- 621 8. Lercher, M. J. & Hurst, L. D. Human SNP variability and mutation rate are higher in regions of  
622 high recombination. *Trends Genet.* **18**, 337–340 (2002).
- 623 9. Francioli, L. C. *et al.* Genome-wide patterns and properties of de novo mutations in humans. *Nat.*  
624 *Genet.* **47**, 822–826 (2015).
- 625 10. Koren, A. *et al.* Differential relationship of DNA replication timing to different forms of human  
626 mutation and variation. *Am. J. Hum. Genet.* **91**, 1033–1040 (2012).
- 627 11. Rahbari, R. *et al.* Timing, rates and spectra of human germline mutation. *Nat. Genet.* **48**, 1–11  
628 (2015).
- 629 12. Goldmann, J. M. *et al.* Parent-of-origin-specific signatures of de novo mutations. *Nat. Genet.* **48**,  
630 935–939 (2016).
- 631 13. Panchin, A. Y. *et al.* New words in human mutagenesis. *BMC Bioinformatics* **12**, 268 (2011).
- 632 14. Nachman, M. W. & Crowell, S. L. Estimate of the mutation rate per nucleotide in humans.  
633 *Genetics* **156**, 297–304 (2000).
- 634 15. Jiang, C. & Zhao, Z. Mutational spectrum in the recent human genome inferred by single  
635 nucleotide polymorphisms. *Genomics* **88**, 527–534 (2006).
- 636 16. Chimpanzee Sequencing and Analysis Consortium. Initial sequence of the chimpanzee genome  
637 and comparison with the human genome. *Nature* **437**, 69–87 (2005).
- 638 17. Williamson, S. H. *et al.* Localizing recent adaptive evolution in the human genome. *PLoS Genet.*  
639 **3**, 0901–0915 (2007).
- 640 18. Nielsen, R., Hellmann, I., Hubisz, M., Bustamante, C. & Clark, A. G. Recent and ongoing  
641 selection in the human genome. *Nat. Rev. Genet.* **8**, 857–868 (2007).
- 642 19. Cai, J. J., Macpherson, J. M., Sella, G. & Petrov, D. A. Pervasive hitchhiking at coding and  
643 regulatory sites in humans. *PLoS Genet.* **5**, e1000336 (2009).
- 644 20. Schaibley, V. M. *et al.* The influence of genomic context on mutation patterns in the human  
645 genome inferred from rare variants. *Genome Res.* **23**, 1974–1984 (2013).
- 646 21. Duret, L. & Galtier, N. Biased gene conversion and the evolution of mammalian genomic  
647 landscapes. *Annu. Rev. Genomics Hum. Genet.* **10**, 285–311 (2009).
- 648 22. Messer, P. W. Measuring the rates of spontaneous mutation from deep and large-scale  
649 polymorphism data. *Genetics* **182**, 1219–1232 (2009).
- 650 23. Slatkin, M. Allele age and a test for selection on rare alleles. *Philos. Trans. R. Soc. Lond. B. Biol.*  
651 *Sci.* **355**, 1663–8 (2000).
- 652 24. Auton, A. *et al.* A global reference for human genetic variation. *Nature* **526**, 68–74 (2015).
- 653 25. Walter, K. *et al.* The UK10K project identifies rare variants in health and disease. *Nature* **526**,  
654 82–90 (2015).
- 655 26. Nelson, M. R. *et al.* An Abundance of Rare Functional Variants in 202 Drug Target Genes

- 656 Sequenced in 14,002 People. *Science* (80-. ). **337**, 100–104 (2012).
- 657 27. Michaelson, J. J. *et al.* Whole-genome sequencing in autism identifies hot spots for de novo  
658 germline mutation. *Cell* **151**, 1431–1442 (2012).
- 659 28. Meunier, J. & Duret, L. Recombination drives the evolution of GC-content in the human genome.  
660 *Mol. Biol. Evol.* **21**, 984–990 (2004).
- 661 29. Deaton, A. & Bird, A. CpG islands and the regulation of transcription. *Genes Dev.* **25**, 1010–1022  
662 (2011).
- 663 30. Melton, C., Reuter, J. a, Spacek, D. V & Snyder, M. Recurrent somatic mutations in regulatory  
664 regions of human cancer genomes. *Nat. Genet.* **47**, 710–716 (2015).
- 665 31. Sabarinathan, R., Mularoni, L., Deu-Pons, J., Gonzalez-Perez, A. & Lopez-Bigas, N. Nucleotide  
666 excision repair is impaired by binding of transcription factors to DNA. *Nature* **532**, 264–267  
667 (2016).
- 668 32. Perera, D. *et al.* Differential DNA repair underlies mutation hotspots at active promoters in cancer  
669 genomes. *Nature* **532**, 259–263 (2016).
- 670 33. Mantovani, R. A survey of 178 NF-Y binding CCAAT boxes. *Nucleic Acids Res.* **26**, 1135–1143  
671 (1998).
- 672 34. Jurka, J. Sequence patterns indicate an enzymatic involvement in integration of mammalian  
673 retroposons. *Proc. Natl. Acad. Sci.* **94**, 1872–1877 (1997).
- 674 35. Gasior, S. L., Wakeman, T. P., Xu, B. & Deininger, P. L. The human LINE-1 retrotransposon  
675 creates DNA double-strand breaks. *J. Mol. Biol.* **357**, 1383–1393 (2006).
- 676 36. Cost, G. J., Golding, A., Schlissel, M. S. & Boeke, J. D. Target DNA chromatinization modulates  
677 nicking by L1 endonuclease. *Nucleic Acids Res.* **29**, 573–577 (2001).
- 678 37. Wong, W. S. W. *et al.* New observations on maternal age effect on germline de novo mutations.  
679 *Nat. Commun.* **7**, 10486 (2016).
- 680 38. Samocha, K. E. *et al.* A framework for the interpretation of de novo mutation in human disease.  
681 *Nat. Genet.* **46**, 944–950 (2014).
- 682 39. Kircher, M. *et al.* A general framework for estimating the relative pathogenicity of human genetic  
683 variants. *Nat Genet* **46**, 310–315 (2014).
- 684 40. Scott, L. J. *et al.* Genome-wide association and meta-analysis of bipolar disorder in individuals of  
685 European ancestry. *Proc. Natl. Acad. Sci. U. S. A.* **106**, 7501–6 (2009).
- 686 41. Pato, M. T. *et al.* The genomic psychiatry cohort: Partners in discovery. *Am. J. Med. Genet. Part*  
687 *B Neuropsychiatr. Genet.* **162**, 306–312 (2013).
- 688 42. Langenecker, S. A., Saunders, E. F. H., Kade, A. M., Ransom, M. T. & McInnis, M. G.  
689 Intermediate: Cognitive phenotypes in bipolar disorder. *J. Affect. Disord.* **122**, 285–293 (2010).
- 690 43. Sklar, P. *et al.* Whole-genome association study of bipolar disorder. *Mol. Psychiatry* **13**, 558–569  
691 (2008).
- 692 44. Miller, M. B. *et al.* The Minnesota Center for Twin and Family Research genome-wide  
693 association study. *Twin Res. Hum. Genet.* **15**, 767–74 (2012).
- 694 45. Bentley, D. R. *et al.* Accurate whole human genome sequencing using reversible terminator  
695 chemistry. *Nature* **456**, 53–9 (2008).
- 696 46. Jun, G., Wing, M. K., Abecasis, G. R. & Kang, H. M. An efficient and scalable analysis framework  
697 for variant extraction and refinement from population-scale DNA sequence data. *Genome Res.*  
698 **25**, 918–925 (2015).
- 699 47. McVean, G. A. *et al.* An integrated map of genetic variation from 1,092 human genomes. *Nature*  
700 **491**, 56–65 (2012).
- 701 48. DePristo, M. A. *et al.* A framework for variation discovery and genotyping using next-generation  
702 DNA sequencing data. *Nat. Genet.* **43**, 491–8 (2011).
- 703 49. Reppell, M., Boehnke, M. & Zöllner, S. The impact of accelerating faster than exponential  
704 population growth on genetic variation. *Genetics* **196**, 819–828 (2014).
- 705 50. Gao, F. & Keinan, A. Inference of super-exponential human population growth via efficient  
706 computation of the site frequency spectrum for generalized models. *Genetics* **202**, 235–245  
707 (2016).

- 708 51. Lek, M. *et al.* Analysis of protein-coding genetic variation in 60,706 humans. *Nature* **536**, 285–  
709 291 (2016).
- 710 52. Coulondre, C., Miller, J. H., Farabaugh, P. J. & Gilbert, W. Molecular basis of base substitution  
711 hotspots in *Escherichia coli*. *Nature* **274**, 775–780 (1978).
- 712 53. Duncan, B. K. & Miller, J. H. Mutagenic deamination of cytosine residues in DNA. *Nature* **287**,  
713 560–561 (1980).
- 714 54. Kong, A. *et al.* Fine-scale recombination rate differences between sexes, populations and  
715 individuals. *Nature* **467**, 1099–1103 (2010).
- 716
